# Supplementary material for: miR-1290 Is a Biomarker in DNA-Mismatch-Repair-Deficient Colon Cancer and Promotes Resistance to 5-Fluorouracil by Directly Targeting hMSH2
Source: PubMed Central journal article supplement — Mol Ther Nucleic Acids. 2017 May 12;7:453–64. doi: 10.1016/j.omtn.2017.05.006 (PMC5443909; doi:10.1016/j.omtn.2017.05.006), 2017-05-12
Supplement: mmc1.pdf [file mmc1.pdf]

OMTN, Volume 7

## **Supplemental Information**

### **miR-1290 Is a Biomarker in DNA-Mismatch-Repair-Deficient Colon Cancer and Promotes Resistance to 5-Fluorouracil by Directly Targeting hMSH2**

**Ling Ye, Tao Jiang, Huanzhang Shao, Lin Zhong, Zhaowen Wang, Yuan Liu, Huamei Tang, Bingyu Qin, Xiaoqing Zhang, and Junwei Fan**

**Supplementary Table S1.** Clinicopathologic features of the 4 dMMR and 4 pMMR colon cancer tissue samples used for laser capture microdissection (LCM)

| Gender | Age (years) | MMR status | Nodal stage | AJCC stage |
|--------|-------------|------------|-------------|------------|
| Male   | 63          | dMMR       | 0           | IIB        |
| Female | 71          | dMMR       | 0           | IIA        |
| Male   | 60          | dMMR       | 1           | IIIA       |
| Male   | 68          | dMMR       | 1           | IIIB       |
| Female | 73          | pMMR       | 1           | IIIA       |
| Female | 62          | pMMR       | 0           | IIB        |
| Male   | 66          | pMMR       | 2           | IIIC       |
| Female | 70          | pMMR       | 1           | IIIA       |

MMR: Mismatch Repair

AJCC: American Joint Committee on Cancer

**Supplementary Table S2.** Differential miRNA expression between dMMR and pMMR colon cancer cells obtained by laser capture microdissection (LCM)

| miRNA        | Expression level |           | P value | Fold change<br>(dMMR/ pMMR) | Up/Down<br>(dMMR/ pMMR) |
|--------------|------------------|-----------|---------|-----------------------------|-------------------------|
|              | dMMR cell        | pMMR cell |         |                             |                         |
| miR-1290     | 5.20             | -2.03     | 0.008   | 9.63                        | Up                      |
| miR-664b-5p  | 3.01             | -2.96     | 0.0004  | 7.08                        | Up                      |
| miR-3607-5p  | 2.73             | -2.09     | 0.004   | 6.65                        | Up                      |
| miR-3138     | 1.35             | -2.15     | 0.009   | 7.89                        | Up                      |
| miR-298      | 2.08             | -1.47     | 0.037   | 5.03                        | Up                      |
| miR-3653     | 3.05             | -1.82     | 0.02    | 8.02                        | Up                      |
| miR-1291     | 1.32             | -2.96     | <0.001  | 8.34                        | Up                      |
| miR-3679-3p  | 1.68             | -2.79     | <0.001  | 7.29                        | Up                      |
| miR-149-3p   | 1.06             | -2.66     | <0.001  | 5.94                        | Up                      |
| miR-30a-5p   | 1.12             | -2.64     | <0.001  | 6.63                        | Up                      |
| miR-345-3p   | 1.15             | -2.25     | <0.001  | 6.79                        | Up                      |
| miR-6511b-5p | 1.14             | -2.13     | 0.002   | 6.58                        | Up                      |

dMMR: Mismatch repair-deficient

pMMR: Mismatch repair-proficient

**Supplementary Table S3.** Oligonucleotide Sequence for the primers used in the study.

| Name       | Oligonucleotide sequence (5' - 3') |                          |
|------------|------------------------------------|--------------------------|
|            | Forward                            | Reverse                  |
| miR-1290   | GGGGATCACATTGCCAGG                 | AGTGCGTGTCGTGGAGTC       |
| miR-3138   | GCCTCCCAAACAAGGGAA                 | CATCCCCTTGTTCCAGCTG      |
| miR-298    | TGTGTTGGCGTACAGGTCT                | GGGAAATCGTGCGTGACAT      |
| miR-3653   | TCTCCCGAGAGACATATTT                | GATGAGAAGGTATGAATCA      |
| miR-1291   | AGCACATATACTAATGGCA                | TTCACGAATTTGCGTGTCA      |
| miR-30a-5p | GAAGGCGCCCAAGCAGCA                 | CTCGGGGCCGGCTGACGA       |
| hMSH2      | GTTCCCGAGAGACATATTAGCAAC           | CGAGAGAAGGTATGAATCACAGG  |
| GAPDH      | CATGGGTGTGAACCATGAGAAGTA           | CAGTAGAGGCAGGGATGATGTTCT |
| U6         | GCTTCGGCAGCACATATACTAAAAT          | CGCTTCACGAATTTGCGTGTCA   |

**Supplementary Table S4.** Univariate and multivariate Cox proportional hazard models for overall survival (OS)

|                   | Overall survival (OS) |         |                     |        |
|-------------------|-----------------------|---------|---------------------|--------|
|                   | Univariate            |         | Multivariate        |        |
|                   | HR (95% CI)           | P       | HR (95% CI)         | P      |
| Age               |                       |         |                     |        |
| <65 y             | 1                     |         |                     |        |
| ≥65 y             | 1.42 (0.92-2.20)      | 0.115   |                     |        |
| Gender            |                       |         |                     |        |
| Male              | 1                     |         |                     |        |
| Female            | 1.34 (0.87-2.07)      | 0.188   |                     |        |
| Location          |                       |         |                     |        |
| Right             | 1                     |         |                     |        |
| Transverse        | 1.07 (0.84-1.36)      | 0.606   |                     |        |
| Left              | 1.53 (0.95-1.91)      | 0.827   |                     |        |
| T stage           |                       |         |                     |        |
| T1+T2             | 1                     |         |                     |        |
| T3+T4             | 1.72 (0.55-5.46)      | 0.35    |                     |        |
| N stage           |                       |         |                     |        |
| N0                | 1                     |         | 1                   |        |
| N1+N2             | 6.50 (3.86-10.98)     | <0.001* | 18.65 (2.35-172.91) | 0.003* |
| AJCC stage        |                       |         |                     |        |
| II                | 1                     |         | 1                   |        |
| III               | 6.50 (3.86-10.98)     | <0.001* | 18.65 (2.35-172.91) | 0.003* |
| Differentiation   |                       |         |                     |        |
| Well              | 1                     |         | 1                   |        |
| Poor              | 3.09 (1.93-4.93)      | <0.001* | 3.05 (1.65-4.61)    | 0.364  |
| Vascular invasion |                       |         |                     |        |
| No                | 1                     |         | 1                   |        |
| Yes               | 4.95 (2.68-9.15)      | <0.001* | 1.82 (1.14-2.86)    | 0.162  |
| miR-1290          |                       |         |                     |        |
| Low               | 1                     |         | 1                   |        |
| High              | 2.87 (1.83-4.50)      | <0.001* | 1.48 (0.85-2.90)    | 0.008* |
| MMR status        |                       |         |                     |        |
| dMMR              | 1                     |         | 1                   |        |
| pMMR              | 0.44 (0.27-0.71)      | 0.001*  | 0.51 (0.37-0.93)    | 0.021* |

HR: Hazard ratio; CI: Confidence interval

\*P<0.05 was considered significant

**Supplementary Table S5.** Univariate and multivariate Cox proportional hazard models for disease free survival (DFS)

|                   | Disease free survival (DFS) |         |                  |         |
|-------------------|-----------------------------|---------|------------------|---------|
|                   | Univariate                  |         | Multivariate     |         |
|                   | HR (95% CI)                 | P       | HR (95% CI)      | P       |
| Age               |                             |         |                  |         |
| <65 y             | 1                           |         |                  |         |
| ≥65 y             | 1.54 (0.97-2.43)            | 0.068   | -                |         |
| Gender            |                             |         |                  |         |
| Male              | 1                           |         |                  |         |
| Female            | 1.26 (0.81-1.97)            | 0.316   | -                |         |
| Location          |                             |         |                  |         |
| Right             | 1                           |         |                  |         |
| Transverse        | 1.15 (0.89-1.49)            | 0.292   | -                |         |
| Left              | 0.62 (0.34-1.02)            | 0.461   |                  |         |
| T stage           |                             |         |                  |         |
| T1+T2             | 1                           |         |                  |         |
| T3+T4             | 1.61 (0.51-5.09)            | 0.421   | -                |         |
| N stage           |                             |         |                  |         |
| N0                | 1                           |         | 1                |         |
| N1+N2             | 6.54 (3.81-11.22)           | <0.001* | 4.29 (2.32-7.61) | <0.001* |
| AJCC stage        |                             |         |                  |         |
| II                | 1                           |         | 1                |         |
| III               | 6.54 (3.81-11.22)           | <0.001* | 4.29 (2.32-7.61) | <0.001* |
| Differentiation   |                             |         |                  |         |
| Well              | 1                           |         | 1                |         |
| Poor              | 2.92 (1.80-4.72)            | <0.001* | 2.14 (1.15-3.48) | 0.182   |
| Vascular invasion |                             |         |                  |         |
| No                | 1                           |         | 1                |         |
| Yes               | 6.32 (3.31-12.08)           | <0.001* | 3.15 (2.32-6.71) | 0.351*  |
| miR-1290          |                             |         |                  |         |
| Low               | 1                           |         | 1                |         |
| High              | 2.84 (1.78-4.53)            | <0.001* | 1.59 (1.32-2.95) | 0.016*  |
| MMR status        |                             |         |                  |         |
| dMMR              | 1                           |         | 1                |         |
| pMMR              | 0.45 (0.27-0.74)            | 0.002*  | 0.43 (0.21-0.87) | 0.018*  |

HR: Hazard ratio; CI: Confidence interval

\*P<0.05 was considered significant
